# Supplementary material for: RETRACTED ARTICLE: Runt-related transcription factor 1 promotes apoptosis and inhibits neuroblastoma progression in vitro and in vivo
Source: Springer Nature journal article supplement (doi:10.1186/s13046-020-01558-2), 2020-03-20
Supplement: MOESM2 [file 17819628]

**Appendix Table S1 Oligonucleotide sets used for constructs**

| Oligo Set | Primers | sequence |
| --- | --- | --- |
| pCMV-C-mCherry-RUNX1 | sense | 5'-CCGCTCGAGATGCGTATCCCCGTAGATGCCAGC-3’ |
|  | antisense | 5’-CGGAATTCGAGGCCGTGTGGAGGCCCTACTGA-3’ |
| sh-Scb | sense | 5'-AGGGATACAAGCATATACCACTCGAGTGGTATATGCTTGTATCCCTC-3' |
|  | antisense | 5'-GAGGGATACAAGCATATACCACTCGAGTGGTATATGCTTGTATCCCT-3' |
| sh-RUNX1#1 | sense | 5’-CCGGTCAGCCATGAAGAACCAGGTTGCAAGATTTAATGACCTCAGGG-3’ |
|  | antisense | 5’-GATCCCCTGAGGTCATTAAATCTTGCAACCTGGTTCTTCATGGCTGA-3’ |
| sh-RUNX1#2 | sense | 5’-CCGGTGTGCCTCCCTGAACCACTCCACTGCCTTTAACCCTCAGCCT G-3’ |
|  | antisense | 5’-GATCCAGGCTGAGGGTTAAAGGCAGTGGAGTGGTTCAGGGAGGCACA-3’ |
| pGL3-Basic-BIRC5 | sense | 5’- CCCAAGCTTCGAGCCAATCAGCAGGACCCA-3’ |
|  | antisense | 5’-CCGCTCGAGCACCCCGCCCCCATTCTTTAA-3’ |
| pGL3-Basic-CSF2RB | sense | 5’-CCCAAGCTTCATTTTCTTGGGTTTCTTAGTCT-3’ |
|  | antisense | 5’-CCGCTCGAGTGTGTCATATGGTCATGTGTGTT-3’ |
| pGL3-Basic- NFKBIA | sense | 5’-CCCAAGCTTATCCACAACCACCACTACAAACA-3’ |
|  | antisense | 5’-CCGCTCGAGGGAAAAAGAAGCCTAAACCCTGA -3’ |

**Appendix Table S2 Primer sets used for qRT-PCR and ChIP**

| Primer set | Primers | sequence | Application |
| --- | --- | --- | --- |
| RUNX1 | sense | 5′-CCGAGAACCTCGAAGACATC-3′ | qRT-PCR |
|  | antisense | 5′-GATGGTTGGATCTGCCTTGT-3′ | qRT-PCR |
| BIRC5 | sense | 5’-GACGACCCCATGCAAAGGAA-3’ | qRT-PCR |
|  | antisense | 5’- GTGGCACCAGGGAATAAACC-3’ | qRT-PCR |
| CSF2RB | sense | 5’-GGCCAATACATCGTCTCTGTT-3’ | qRT-PCR |
|  | antisense | 5’-GTCTCGGTCTTGCTGTCCTTC-3’ | qRT-PCR |
| FOS | sense | 5’-CCAGTGCCAACTTCATTCCC-3’ | qRT-PCR |
|  | antisense | 5’-TGTTCCACCTTGCCCCTCCT-3’ | qRT-PCR |
| NFKBIA | sense | 5’-AGGAAATACCCCCCTACACC-3’ | qRT-PCR |
|  | antisense | 5’-ATCAGCACCCAAGGACACCA-3’ | qRT-PCR |
| PARP4 | sense | 5’-TGCCTCATATCGTCAGGTAGC-3’ | qRT-PCR |
|  | antisense | 5’-TAGGGTGAAGAAGGTGGGTTC-3’ | qRT-PCR |
| TNFSF10 | sense | 5’-GCGTGCTGATCGTGATCTTCA-3’ | qRT-PCR |
|  | antisense | 5’-TACTCTCTTCGTCATTGGGGT-3’ | qRT-PCR |
| beta-actin | sense | 5’-GCACTCTTCCAGCCTTCCT-3’ | qRT-PCR |
|  | antisense | 5’-AGGTCTTTGCGGATGTCCAC-3’ | qRT-PCR |
| BIRC5-ChIP | sense | 5’-TGATGATTGTGTTGTGGTTGTGTA-3’ | ChIP |
|  | antisense | 5’-TTCTGTTTATGTTTTGCCTGTTTC-3’ | ChIP |
| CSF2RB-ChIP | sense | 5’-TGCGTTTTGTTGTGTCTTGGC-3’ | ChIP |
|  | antisense | 5’-GAATGAATGAGTGGCTCCCTG-3’ | ChIP |
| NFKBIA-ChIP | sense | 5’-CCATCATTTCCACTCTTGCGT-3’ | ChIP |
|  | antisense | 5’-GCCTTCTTTCCCTGGGGTTTC-3’ | ChIP |

**Appendix Table S3 P values for differences between experimental groups in figures**

| Figure | Comparison | Sample number | | P-value | | Statistical analysis |
| --- | --- | --- | --- | --- | --- | --- |
| Fig. 1b | Survival: RUNX1: High vs. Low | High (n=249), Low (n=249) | | =0.019 | | Log-rank test |
|  | Survival: HNF4A: High vs. Low | High (n=249), Low (n=249) | | =0.053 | | Log-rank test |
| Fig. 1c | MYCN amplification: Yes vs. No | Yes (n=92), No (n=401) | | <0.0001 | | unpaired t-test |
|  | Progression: Yes vs. No | Yes (n=183), No (n=315) | | <0.0001 | | unpaired t-test |
|  | INSS stage: 4 vs. 2 | 4 (n=183), 2 (n=315) | | =0.0014 | | unpaired t-test |
| Fig. 1f | IHC, RUNX1 WD vs. GD | WD (n=5), GD (n=5) | | =0.0001 | | unpaired t-test |
|  | IHC, RUNX1 PD vs. GD | PD (n=5), GD (n=5) | | <0.0001 | | unpaired t-test |
|  | IHC, RUNX1 UD vs. GD | UD (n=5), GD (n=5) | | <0.0001 | | unpaired t-test |
| Fig. 2b | CCK8 OD: RUNX1 vs. Mock; SH-SY5Y | 3 | | 0.0064 | | One-way ANOVA |
|  | CCK8 OD: sh-RUNX1 #1 vs. sh-Scb; SH-SY5Y | 3 | | 0.0065 | | One-way ANOVA |
|  | CCK8 OD: sh-RUNX1 #2 vs. sh-Scb; SH-SY5Y | 3 | | =0.0001 | | One-way ANOVA |
|  | CCK8 OD: RUNX1 vs. Mock; SK-N-SH | 3 | | 0.0006 | | One-way ANOVA |
|  | CCK8 OD: sh-RUNX1 #1 vs. sh-Scb; SK-N-SH | 3 | | 0.0026 | | One-way ANOVA |
|  | CCK8 OD: sh-RUNX1 #2 vs. sh-Scb; SK-N-SH | 3 | | =0.0001 | | One-way ANOVA |
| Fig. 2c | RUNX1 vs. Mock; SH-SY5Y | 3 | | =0.0002 | | unpaired t-test |
|  | sh-RUNX1 #1 vs. sh-Scb; SH-SY5Y | 3 | | <0.0001 | | unpaired t-test |
|  | sh-RUNX1 #2 vs. sh-Scb; SH-SY5Y | 3 | | <0.0001 | | unpaired t-test |
|  | RUNX1 vs. Mock; SK-N-SH | 3 | | =0.0002 | | unpaired t-test |
|  | sh-RUNX1 #1 vs. sh-Scb; SK-N-SH | 3 | | <0.0001 | | unpaired t-test |
|  | sh-RUNX1 #2 vs. sh-Scb; SK-N-SH | 3 | | <0.0001 | | unpaired t-test |
| Fig. 2d | RUNX1 vs. Mock; SH-SY5Y | 4 | | <0.0001 | | unpaired t-test |
|  | sh-RUNX1 #1 vs. sh-Scb; SH-SY5Y | 4 | | <0.0001 | | unpaired t-test |
|  | sh-RUNX1 #2 vs. sh-Scb; SH-SY5Y | 4 | | <0.0001 | | unpaired t-test |
|  | RUNX1 vs. Mock; SK-N-SH | 4 | | 0.0013 | | unpaired t-test |
|  | sh-RUNX1 #1 vs. sh-Scb; SK-N-SH | 4 | | <0.0001 | | unpaired t-test |
|  | sh-RUNX1 #2 vs. sh-Scb; SK-N-SH | 4 | | <0.0001 | | unpaired t-test |
| Fig. 2e | RUNX1 vs. Mock; SH-SY5Y | 3 | | 0.0051 | | unpaired t-test |
|  | sh-RUNX1 #1 vs. sh-Scb; SH-SY5Y | 3 | | 0.0017 | | unpaired t-test |
|  | sh-RUNX1 #2 vs. sh-Scb; SH-SY5Y | 3 | | 0.0008 | | unpaired t-test |
|  | RUNX1 vs. Mock; SK-N-SH | 3 | | 0.0006 | | unpaired t-test |
|  | sh-RUNX1 #1 vs. sh-Scb; SK-N-SH | 3 | | 0.0129 | | unpaired t-test |
|  | sh-RUNX1 #2 vs. sh-Scb; SK-N-SH | 3 | | 0.0257 | | unpaired t-test |
| Fig. 3a | RUNX1 vs. Mock; SH-SY5Y | 3 | | 0.0021 | | unpaired t-test |
|  | sh-RUNX1 #1 vs. sh-Scb; SH-SY5Y | 3 | | 0.0215 | | unpaired t-test |
|  | sh-RUNX1 #2 vs. sh-Scb; SH-SY5Y | 3 | | 0.0485 | | unpaired t-test |
|  | RUNX1 vs. Mock; SK-N-SH | 3 | | 0.0049 | | unpaired t-test |
|  | sh-RUNX1 #1 vs. sh-Scb; SK-N-SH | 3 | | 0.0068 | | unpaired t-test |
|  | sh-RUNX1 #2 vs. sh-Scb; SK-N-SH | 3 | | 0.0023 | | unpaired t-test |
| Fig. 3b | RUNX1 vs. Mock; SH-SY5Y | 3 | | <0.0001 | | unpaired t-test |
|  | sh-RUNX1 #1 vs. sh-Scb; SH-SY5Y | 3 | | 0.0308 | | unpaired t-test |
|  | sh-RUNX1 #2 vs. sh-Scb; SH-SY5Y | 3 | | 0.0285 | | unpaired t-test |
|  | RUNX1 vs. Mock; SK-N-SH | 3 | | <0.0001 | | unpaired t-test |
|  | sh-RUNX1 #1 vs. sh-Scb; SK-N-SH | 3 | | 0.0183 | | unpaired t-test |
|  | sh-RUNX1 #2 vs. sh-Scb; SK-N-SH | 3 | | 0.0323 | | unpaired t-test |
| Fig. 3c | mRNA RUNX1, RUNX1 vs. Mock; SH-SY5Y | 3 | | <0.0001 | | unpaired t-test |
|  | mRNA RUNX1, sh-RUNX1 #1 vs. sh-Scb; SH-SY5Y | 3 | | 0.0081 | | unpaired t-test |
|  | mRNA RUNX1, sh-RUNX1 #2 vs. sh-Scb; SH-SY5Y | 3 | | 0.0113 | | unpaired t-test |
|  | mRNA Bax, RUNX1 vs. Mock; SH-SY5Y | 3 | | <0.0001 | | unpaired t-test |
|  | mRNA Bax, sh-RUNX1 #1 vs. sh-Scb; SH-SY5Y | 3 | | 0.0388 | | unpaired t-test |
|  | mRNA Bax, sh-RUNX1 #2 vs. sh-Scb; SH-SY5Y | 3 | | 0.0160 | | unpaired t-test |
|  | mRNA Bcl-2, RUNX1 vs. Mock; SH-SY5Y | 3 | | <0.0001 | | unpaired t-test |
|  | mRNA Bcl-2, sh-RUNX1 #1 vs. sh-Scb; SH-SY5Y | 3 | | 0.0081 | | unpaired t-test |
|  | mRNA Bcl-2, sh-RUNX1 #2 vs. sh-Scb; SH-SY5Y | 3 | | 0.0113 | | unpaired t-test |
|  | mRNA cleaved caspased-3, RUNX1 vs. Mock; SH-SY5Y | 3 | | 0.0146 | | unpaired t-test |
|  | mRNA cleaved caspased-3, sh-RUNX1 #1 vs. sh-Scb; SH-SY5Y | 3 | | <0.0001 | | unpaired t-test |
|  | mRNA cleaved caspased-3, sh-RUNX1 #2 vs. sh-Scb; SH-SY5Y | 3 | | <0.0001 | | unpaired t-test |
|  | mRNA RUNX1, RUNX1 vs. Mock; SK-N-SH | 3 | | <0.0001 | | unpaired t-test |
|  | mRNA RUNX1, sh-RUNX1 #1 vs. sh-Scb; SK-N-SH | 3 | | 0.0008 | | unpaired t-test |
|  | mRNA RUNX1, sh-RUNX1 #2 vs. sh-Scb; SK-N-SH | 3 | | 0.0074 | | unpaired t-test |
|  | mRNA Bax, RUNX1 vs. Mock; SK-N-SH | 3 | | <0.0001 | | unpaired t-test |
|  | mRNA Bax, sh-RUNX1 #1 vs. sh-Scb; SK-N-SH | 3 | | 0.0388 | | unpaired t-test |
|  | mRNA Bax, sh-RUNX1 #2 vs. sh-Scb; SK-N-SH | 3 | | 0.0046 | | unpaired t-test |
|  | mRNA Bcl-2, RUNX1 vs. Mock; SK-N-SH | 3 | | <0.0001 | | unpaired t-test |
|  | mRNA Bcl-2, sh-RUNX1 #1 vs. sh-Scb; SK-N-SH | 3 | | <0.0001 | | unpaired t-test |
|  | mRNA Bcl-2, sh-RUNX1 #2 vs. sh-Scb; SK-N-SH | 3 | | 0.0002 | | unpaired t-test |
|  | mRNA cleaved caspased-3, RUNX1 vs. Mock; SH-SY5Y | 3 | | 0.0002 | | unpaired t-test |
|  | mRNA cleaved caspased-3, sh-RUNX1 #1 vs. sh-Scb; SK-N-SH | 3 | | 0.0066 | | unpaired t-test |
|  | mRNA cleaved caspased-3, sh-RUNX1 #2 vs. sh-Scb; SK-N-SH | 3 | | 0.0074 | | unpaired t-test |
| Fig. 3d | RUNX1 vs. Mock; SH-SY5Y | 3 | | 0.0003 | | unpaired t-test |
|  | sh-RUNX1 #1 vs. sh-Scb; SH-SY5Y | 3 | | 0.0008 | | unpaired t-test |
|  | sh-RUNX1 #2 vs. sh-Scb; SH-SY5Y | 3 | | <0.0001 | | unpaired t-test |
|  | RUNX1 vs. Mock; SK-N-SH | 3 | | 0.0013 | | unpaired t-test |
|  | sh-RUNX1 #1 vs. sh-Scb; SK-N-SH | 3 | | 0.0001 | | unpaired t-test |
|  | sh-RUNX1 #2 vs. sh-Scb; SK-N-SH | 3 | | 0.0002 | | unpaired t-test |
| Fig. 3f | RUNX1 vs. Mock; SH-SY5Y | 3 | | 0.0003 | | unpaired t-test |
|  | sh-RUNX1 #1 vs. sh-Scb; SH-SY5Y | 3 | | 0.0008 | | unpaired t-test |
|  | sh-RUNX1 #2 vs. sh-Scb; SH-SY5Y | 3 | | <0.0001 | | unpaired t-test |
|  | RUNX1 vs. Mock; SK-N-SH | 3 | | 0.0013 | | unpaired t-test |
|  | sh-RUNX1 #1 vs. sh-Scb; SK-N-SH | 3 | | 0.0001 | | unpaired t-test |
|  | sh-RUNX1 #2 vs. sh-Scb; SK-N-SH | 3 | | 0.0002 | | unpaired t-test |
| Fig. 4c | RUNX1: RUNX1 vs. Mock; SH-SY5Y | 3 | | <0.0001 | | unpaired t-test |
|  | RUNX1: sh-RUNX1 #1 vs. sh-Scb; SH-SY5Y | 3 | | 0.0008 | | unpaired t-test |
|  | RUNX1: sh-RUNX1 #2 vs. sh-Scb; SH-SY5Y | 3 | | <0.0001 | | unpaired t-test |
|  | RUNX1: RUNX1 vs. Mock; SH-SY5Y | 3 | | <0.0001 | | unpaired t-test |
|  | RUNX1: sh-RUNX1 #1 vs. sh-Scb; SH-SY5Y | 3 | | 0.0136 | | unpaired t-test |
|  | RUNX1: sh-RUNX1 #2 vs. sh-Scb; SH-SY5Y | 3 | | 0.0071 | | unpaired t-test |
|  | BIRC5: RUNX1 vs. Mock; SH-SY5Y | 3 | | 0.0076 | | unpaired t-test |
|  | BIRC5: sh-RUNX1 #1 vs. sh-Scb; SH-SY5Y | 3 | | <0.0001 | | unpaired t-test |
|  | BIRC5: sh-RUNX1 #2 vs. sh-Scb; SH-SY5Y | 3 | | <0.0001 | | unpaired t-test |
|  | CSF2RB: RUNX1 vs. Mock; SH-SY5Y | 3 | | 0.0002 | | unpaired t-test |
|  | CSF2RB: sh-RUNX1 #1 vs. sh-Scb; SH-SY5Y | 3 | | 0.0012 | | unpaired t-test |
|  | CSF2RB: sh-RUNX1 #2 vs. sh-Scb; SH-SY5Y | 3 | | 0.0010 | | unpaired t-test |
|  | NFKBIA: RUNX1 vs. Mock; SH-SY5Y | 3 | | 0.0001 | | unpaired t-test |
|  | NFKBIA: sh-RUNX1 #1 vs. sh-Scb; SH-SY5Y | 3 | | 0.0016 | | unpaired t-test |
|  | NFKBIA: sh-RUNX1 #2 vs. sh-Scb; SH-SY5Y | 3 | | 0.0018 | | unpaired t-test |
|  | FOS: RUNX1 vs. Mock; SH-SY5Y | 3 | | 0.5533 | | unpaired t-test |
|  | FOS: sh-RUNX1 #1 vs. sh-Scb; SH-SY5Y | 3 | | 0.0688 | | unpaired t-test |
|  | FOS: sh-RUNX1 #2 vs. sh-Scb; SH-SY5Y | 3 | | 0.0768 | | unpaired t-test |
|  | PARP4: RUNX1 vs. Mock; SH-SY5Y | 3 | | 0.6334 | | unpaired t-test |
|  | PARP4: sh-RUNX1 #1 vs. sh-Scb; SH-SY5Y | 3 | | 0.6930 | | unpaired t-test |
|  | PARP4: sh-RUNX1 #2 vs. sh-Scb; SH-SY5Y | 3 | | 0.3091 | | unpaired t-test |
|  | TNFSF10: RUNX1 vs. Mock; SH-SY5Y | 3 | | 0.7349 | | unpaired t-test |
|  | TNFSF10: sh-RUNX1 #1 vs. sh-Scb; SH-SY5Y | 3 | | 0.3621 | | unpaired t-test |
|  | TNFSF10: sh-RUNX1 #2 vs. sh-Scb; SH-SY5Y | 3 | | 0.4445 | | unpaired t-test |
| Fig. 4c | RUNX1: RUNX1 vs. Mock; SK-N-SH | 3 | | 0.0005 | | unpaired t-test |
|  | RUNX1: sh-RUNX1 #1 vs. sh-Scb; SK-N-SH | 3 | | 0.0010 | | unpaired t-test |
|  | RUNX1: sh-RUNX1 #2 vs. sh-Scb; SK-N-SH | 3 | | 0.0001 | | unpaired t-test |
|  | BIRC5: RUNX1 vs. Mock; SK-N-SH | 3 | | 0.0104 | | unpaired t-test |
|  | BIRC5: sh-RUNX1 #1 vs. sh-Scb; SK-N-SH | 3 | | <0.0001 | | unpaired t-test |
|  | BIRC5: sh-RUNX1 #2 vs. sh-Scb; SK-N-SH | 3 | | <0.0001 | | unpaired t-test |
|  | CSF2RB: RUNX1 vs. Mock; SK-N-SH | 3 | | 0.0004 | | unpaired t-test |
|  | CSF2RB: sh-RUNX1 #1 vs. sh-Scb; SK-N-SH | 3 | | 0.0136 | | unpaired t-test |
|  | CSF2RB: sh-RUNX1 #2 vs. sh-Scb; SK-N-SH | 3 | | 0.0175 | | unpaired t-test |
|  | NFKBIA: RUNX1 vs. Mock; SK-N-SH | 3 | | <0.0001 | | unpaired t-test |
|  | NFKBIA: sh-RUNX1 #1 vs. sh-Scb; SK-N-SH | 3 | | 0.0126 | | unpaired t-test |
|  | NFKBIA: sh-RUNX1 #2 vs. sh-Scb; SK-N-SH | 3 | | 0.0010 | | unpaired t-test |
|  | FOS: RUNX1 vs. Mock; SK-N-SH | 3 | | 0.8993 | | unpaired t-test |
|  | FOS: sh-RUNX1 #1 vs. sh-Scb; SK-N-SH | 3 | | 0.1163 | | unpaired t-test |
|  | FOS: sh-RUNX1 #2 vs. sh-Scb; SK-N-SH | 3 | | 0.3698 | | unpaired t-test |
|  | PARP4: RUNX1 vs. Mock; SK-N-SH | 3 | | 0.5721 | | unpaired t-test |
|  | PARP4: sh-RUNX1 #1 vs. sh-Scb; SK-N-SH | 3 | | 0.5736 | | unpaired t-test |
|  | PARP4: sh-RUNX1 #2 vs. sh-Scb; SK-N-SH | 3 | | 0.5371 | | unpaired t-test |
|  | TNFSF10: RUNX1 vs. Mock; SK-N-SH | 3 | | 0.2891 | | unpaired t-test |
|  | TNFSF10: sh-RUNX1 #1 vs. sh-Scb; SK-N-SH -SY5Y | 3 | | 0.4135 | | unpaired t-test |
|  | TNFSF10: sh-RUNX1 #2 vs. sh-Scb; SK-N-SH | 3 | | 0.5425 | | unpaired t-test |
| Fig. 5b | BIRC5: RUNX1 vs. Mock; SH-SY5Y | 3 | | 0.0003 | | unpaired t-test |
|  | BIRC5: sh-RUNX1 #1 vs. sh-Scb; SH-SY5Y | 3 | | <0.0001 | | unpaired t-test |
|  | BIRC5: sh-RUNX1 #2 vs. sh-Scb; SH-SY5Y | 3 | | 0.0181 | | unpaired t-test |
|  | CSF2RB: RUNX1 vs. Mock; SH-SY5Y | 3 | | 0.0002 | | unpaired t-test |
|  | CSF2RB: sh-RUNX1 #1 vs. sh-Scb; SH-SY5Y | 3 | | 0.0164 | | unpaired t-test |
|  | CSF2RB: sh-RUNX1 #2 vs. sh-Scb; SH-SY5Y | 3 | | 0.0435 | | unpaired t-test |
|  | NFKBIA: RUNX1 vs. Mock; SH-SY5Y | 3 | | 0.0004 | | unpaired t-test |
|  | NFKBIA: sh-RUNX1 #1 vs. sh-Scb; SH-SY5Y | 3 | | 0.0164 | | unpaired t-test |
|  | NFKBIA: sh-RUNX1 #2 vs. sh-Scb; SH-SY5Y | 3 | | 0.0045 | | unpaired t-test |
|  | BIRC5: RUNX1 vs. Mock; SK-N-SH | 3 | | 0.0104 | | unpaired t-test |
|  | BIRC5: sh-RUNX1 #1 vs. sh-Scb; SK-N-SH | 3 | | 0.0017 | | unpaired t-test |
|  | BIRC5: sh-RUNX1 #2 vs. sh-Scb; SK-N-SH | 3 | | 0.0012 | | unpaired t-test |
|  | CSF2RB: RUNX1 vs. Mock; SK-N-SH | 3 | | 0.0004 | | unpaired t-test |
|  | CSF2RB: sh-RUNX1 #1 vs. sh-Scb; SK-N-SH | 3 | | 0.0134 | | unpaired t-test |
|  | CSF2RB: sh-RUNX1 #2 vs. sh-Scb; SK-N-SH | 3 | | 0.0269 | | unpaired t-test |
|  | NFKBIA: RUNX1 vs. Mock; SK-N-SH | 3 | | 0.0003 | | unpaired t-test |
|  | NFKBIA: sh-RUNX1 #1 vs. sh-Scb; SK-N-SH | 3 | | 0.0093 | | unpaired t-test |
|  | NFKBIA: sh-RUNX1 #2 vs. sh-Scb; SK-N-SH | 3 | | 0.0380 | | unpaired t-test |
| Fig. 5c | BIRC5: RUNX1 vs. Mock; SH-SY5Y | 3 | | 0.0015 | | unpaired t-test |
|  | BIRC5: sh-RUNX1 #1 vs. sh-Scb; SH-SY5Y | 3 | | 0.0041 | | unpaired t-test |
|  | BIRC5: sh-RUNX1 #2 vs. sh-Scb; SH-SY5Y | 3 | | 0.0034 | | unpaired t-test |
|  | CSF2RB: RUNX1 vs. Mock; SH-SY5Y | 3 | | <0.0001 | | unpaired t-test |
|  | CSF2RB: sh-RUNX1 #1 vs. sh-Scb; SH-SY5Y | 3 | | 0.0032 | | unpaired t-test |
|  | CSF2RB: sh-RUNX1 #2 vs. sh-Scb; SH-SY5Y | 3 | | 0.0027 | | unpaired t-test |
|  | NFKBIA: RUNX1 vs. Mock; SH-SY5Y | 3 | | <0.0001 | | unpaired t-test |
|  | NFKBIA: sh-RUNX1 #1 vs. sh-Scb; SH-SY5Y | 3 | | 0.0159 | | unpaired t-test |
|  | NFKBIA: sh-RUNX1 #2 vs. sh-Scb; SH-SY5Y | 3 | | 0.0074 | | unpaired t-test |
|  | BIRC5: RUNX1 vs. Mock; SK-N-SH | 3 | | 0.0104 | | unpaired t-test |
|  | BIRC5: sh-RUNX1 #1 vs. sh-Scb; SK-N-SH | 3 | | <0.0001 | | unpaired t-test |
|  | BIRC5: sh-RUNX1 #2 vs. sh-Scb; SK-N-SH | 3 | | 0.0008 | | unpaired t-test |
|  | CSF2RB: RUNX1 vs. Mock; SK-N-SH | 3 | | <0.0001 | | unpaired t-test |
|  | CSF2RB: sh-RUNX1 #1 vs. sh-Scb; SK-N-SH | 3 | | 0.0068 | | unpaired t-test |
|  | CSF2RB: sh-RUNX1 #2 vs. sh-Scb; SK-N-SH | 3 | | 0.0111 | | unpaired t-test |
|  | NFKBIA: RUNX1 vs. Mock; SK-N-SH | 3 | | <0.0001 | | unpaired t-test |
|  | NFKBIA: sh-RUNX1 #1 vs. sh-Scb; SK-N-SH | 3 | | 0.0004 | | unpaired t-test |
|  | NFKBIA: sh-RUNX1 #2 vs. sh-Scb; SK-N-SH | 3 | | 0.0127 | | unpaired t-test |
| Fig. 5d | Survival: BIRC5: High vs. Low | High (n=249), Low (n=249) | | 0.0004 | | Log-rank test |
|  | Survival: CSF2RB: High vs. Low | High (n=249), Low (n=249) | | 0.0004 | | Log-rank test |
|  | Survival: NFKBIA: High vs. Low | High (n=249), Low (n=249) | | 0.0004 | | Log-rank test |
| Fig. 6a | Tumor volume: RUNX1 vs. Mock | 5 | | 0.0450 | | One-way ANOVA |
|  | Tumor volume: sh-RUNX1 #1 vs. sh-Scb | 5 | | 0.0278 | | One-way ANOVA t |
| Fig. 6b | RUNX1 vs. Mock | 5 | | 0.0002 | | unpaired t-test |
|  | sh-RUNX1 #1 vs. sh-Scb | 5 | | 0.0016 | | unpaired t-test |
| Fig. 6c | cleaved caspased-3 expression, RUNX1 vs. Mock | 5 | | <0.0001 | | unpaired t-test |
|  | cleaved caspased-3 expression ,sh-RUNX1 #1 vs. sh-Scb | 5 | | <0.0001 | | unpaired t-test |
|  | Tube counts, RUNX1 vs. Mock | 5 | | 0.0007 | | unpaired t-test |
|  | Tube counts, sh-RUNX1 #1 vs. sh-Scb | 5 | | <0.0001 | | unpaired t-test |
| Fig. 6d | RUNX1 vs. Mock | 5 | | <0.0001 | | unpaired t-test |
|  | sh-RUNX1 #1 vs. sh-Scb | 5 | | 0.0001 | | unpaired t-test |
| Fig. 6e | RUNX1 vs. Mock | 5 | | <0.0001 | | unpaired t-test |
|  | sh-RUNX1 #1 vs. sh-Scb | 5 | | <0.0001 | | unpaired t-test |
| Fig. 7b | CCK8 OD: Cytarabine vs. DMSO; SH-SY5Y | 3 | | 0.03089 | | One-way ANOVA |
|  | CCK8 OD: Cisplatin vs. DMSO; SH-SY5Y | 3 | | 0.04982 | | One-way ANOVA |
| Fig. 7d | sh-Scb + Cisplatin vs. sh-Scb + DMSO | 3 | | 0.0018 | | unpaired t-test |
|  | sh-RUNX1 + DMSO vs. sh-Scb + DMSO | 3 | | 0.0003 | | unpaired t-test |
|  | sh-RUNX1 + Cisplatin vs. sh-Scb + DMSO | 3 | | 0.3046 | | unpaired t-test |
| Fig. 7e | sh-Scb + Cisplatin vs. sh-Scb + DMSO | 3 | | <0.0001 | | unpaired t-test |
|  | sh-RUNX1 + DMSO vs. sh-Scb + DMSO | 3 | | 0.0036 | | unpaired t-test |
|  | sh-RUNX1 + Cisplatin vs. sh-Scb + DMSO | 3 | | 0.1297 | | unpaired t-test |
| Fig. 7f | sh-Scb + Cisplatin vs. sh-Scb + DMSO | 3 | | <0.0001 | | unpaired t-test |
|  | sh-RUNX1 + DMSO vs. sh-Scb + DMSO | 3 | | 0.0080 | | unpaired t-test |
|  | sh-RUNX1 + Cisplatin vs. sh-Scb + DMSO | 3 | | 0.8017 | | unpaired t-test |
| Fig. S1a | Neuroblastoma: MYCN vs. RUNX1 | 498 | 0.113 | | Pearson’s correlation coefficient | |
| Fig. S2a | Neuroblastoma: TUBA1A vs. RUNX1 | 498 (GSE49710) | 8.71e-105 | | Pearson’s correlation coefficient | |
| Neuroblastoma: TUBA1A vs. RUNX1 | 498 (GSE45547) | 5.94e-05 | |
| Fig. S2b | Neuroblastoma: BIRC5 vs. RUNX1 | 498 (GSE49710) | 4.99e-03 | |
| Neuroblastoma: BIRC5 vs. RUNX1 | 498 (GSE45547) | 5.10e-06 | |
| Fig. S2c | Neuroblastoma: CSF2RB vs. RUNX1 | 498 (GSE49710) | 8.71e-105 | |
| Neuroblastoma: CSF2RB vs. RUNX1 | 498 (GSE45547) | 1.55e-03 | |
| Fig. S2d | Neuroblastoma: NFKBIA vs. RUNX1 | 498 (GSE49710) | 1.30e-13 | |
| Neuroblastoma: NFKBIA vs. RUNX1 | 498 (GSE45547) | 1.68e-09 | |
| Fig. S2e | Neuroblastoma: FOS vs. RUNX1 | 498 (GSE49710) | 3.61e-09 | |
| Neuroblastoma: FOS vs. RUNX1 | 498 (GSE45547) | 3.27e-14 | |
| Fig. S2f | Neuroblastoma: PARP4 vs. RUNX1 | 498 (GSE49710) | 4.22e-24 | |
| Neuroblastoma: PARP4 vs. RUNX1 | 498 (GSE45547) | 1.30e-05 | |
| Fig. S2g | Neuroblastoma: TNFSF10 vs. RUNX1 | 498 (GSE49710) | 8.15e-25 | |
| Neuroblastoma: TNFSF10 vs. RUNX1 | 498 (GSE45547) | 8.68e-28 | |
