# Supplementary figures and images for: RETRACTED ARTICLE: Runt-related transcription factor 1 promotes apoptosis and inhibits neuroblastoma progression in vitro and in vivo
Source: Springer Nature journal article supplement (doi:10.1186/s13046-020-01558-2), 2020-03-20

# Supplementary figure S1

**a**

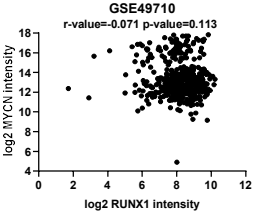

# Supplementary figure S2

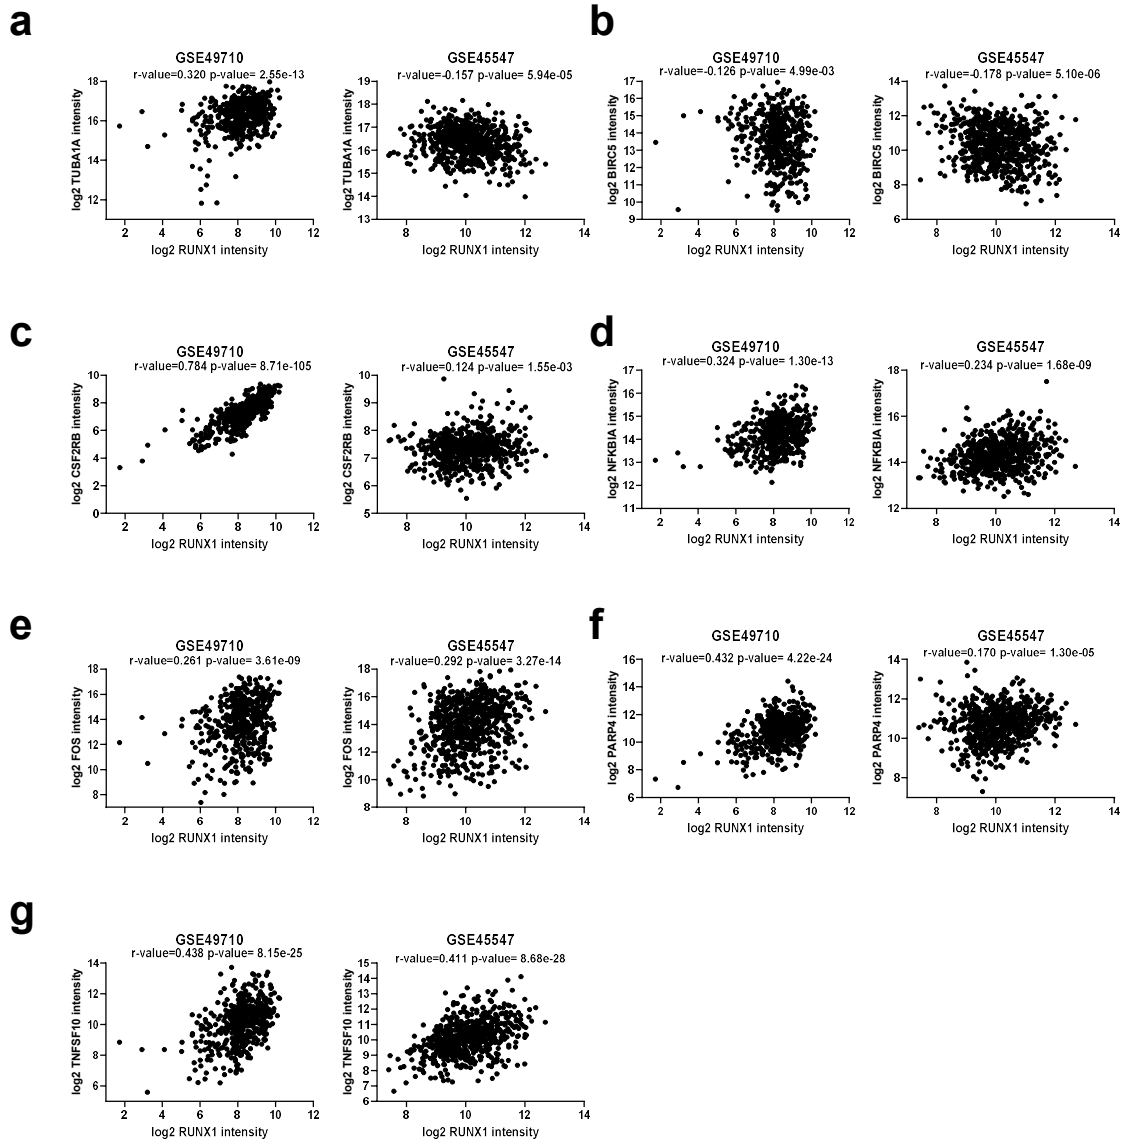

Supplement: MOESM1 [file 17819628]
